# Supplementary material for: The Impact of Free and Added Sugars on Cognitive Function: A Systematic Review and Meta-Analysis
Source: MDPI journal article supplement (doi:10.3390/nu16010075), 2023-12-25
Supplement: s1 [file s1]

|                                     | Random sequence generation (selection bias) | Allocation concealment (selection bias) | Blinding of participants and personnel (performance bias): All outcomes | Blinding of outcome assessment (detection bias): All outcomes | Incomplete outcome data (attrition bias): All outcomes | Selective reporting (reporting bias) | Other bias |
|-------------------------------------|---------------------------------------------|-----------------------------------------|-------------------------------------------------------------------------|---------------------------------------------------------------|--------------------------------------------------------|--------------------------------------|------------|
| Adan and Serra-Grabulosa, 2010 [51] | +                                           | ?                                       | +                                                                       | ?                                                             | +                                                      | +                                    | ?          |
| Allen et al., 1996 [62]             | +                                           | ?                                       | +                                                                       | ?                                                             | +                                                      | +                                    | ?          |
| Al-Sabah et al., 2020 [44]          | +                                           | +                                       | +                                                                       | +                                                             | +                                                      | +                                    |            |
| Azari, 1991 [63]                    | +                                           | ?                                       | +                                                                       | ?                                                             | +                                                      | +                                    |            |
| Baym et al., 2014 [40]              | +                                           | +                                       | +                                                                       | +                                                             | +                                                      | +                                    |            |
| Benton, 1990 [65]                   | ?                                           | ?                                       | +                                                                       | ?                                                             | +                                                      | +                                    | ?          |
| Benton and Owens, 1993 [66]         | +                                           | ?                                       | +                                                                       | ?                                                             | +                                                      | +                                    | ?          |
| Benton and Stevens, 2008 [68]       | +                                           | ?                                       | +                                                                       | ?                                                             | +                                                      | +                                    | ?          |
| Benton et al., 1987 [64]            | +                                           | ?                                       | +                                                                       | ?                                                             | +                                                      | +                                    | ?          |
| Benton et al., 1994 [67]            | ?                                           | ?                                       | +                                                                       | ?                                                             | +                                                      | +                                    | ?          |
| Berger et al., 2020 [46]            | +                                           | +                                       | +                                                                       | +                                                             | +                                                      | +                                    | +          |
| Best et al., 2008 [69]              | ?                                           | ?                                       | +                                                                       | ?                                                             | +                                                      | ?                                    | ?          |
| Birnie et al., 2015 [70]            | ?                                           | ?                                       | +                                                                       | ?                                                             | +                                                      | +                                    | ?          |
| Brandt, 2015 [74]                   | ?                                           | ?                                       | +                                                                       | ?                                                             | +                                                      | ?                                    | ?          |
| Brandt et al., 2006 [71]            | +                                           | ?                                       | +                                                                       | ?                                                             | +                                                      | +                                    | ?          |
| Brandt et al., 2010 [72]            | +                                           | ?                                       | +                                                                       | ?                                                             | +                                                      | +                                    | ?          |
| Brandt et al., 2013 [73]            | +                                           | ?                                       | +                                                                       | ?                                                             | +                                                      | +                                    | ?          |
| Brody and Wolitzky, 1983 [75]       | ?                                           | ?                                       | ?                                                                       | ?                                                             | +                                                      | ?                                    | ?          |
| Brown and Riby, 2013 [76]           | +                                           | ?                                       | +                                                                       | ?                                                             | +                                                      | +                                    | ?          |
| Chong et al., 2019 [14]             | +                                           | +                                       | +                                                                       | +                                                             | +                                                      | +                                    |            |
| Cohen et al., 2018 [47]             | +                                           | +                                       | +                                                                       | +                                                             | +                                                      | +                                    | +          |
| Craft et al., 1994 [77]             | ?                                           | ?                                       | ?                                                                       | ?                                                             | +                                                      | +                                    | ?          |
| Donohoe and Benton, 1999a [78]      | +                                           | ?                                       | +                                                                       | ?                                                             | +                                                      | +                                    | ?          |
| Donohoe and Benton, 1999b [79]      | +                                           | ?                                       | +                                                                       | ?                                                             | +                                                      | +                                    | ?          |
| Flint and Turek, 2003 [80]          | +                                           | ?                                       | ?                                                                       | ?                                                             | +                                                      | +                                    | ?          |
| Ford et al., 2002 [81]              | +                                           | ?                                       | +                                                                       | ?                                                             | +                                                      | +                                    | ?          |
| Foster et al., 1998 [52]            | +                                           | ?                                       | +                                                                       | ?                                                             | +                                                      | +                                    | ?          |
| Giles et al., 2018 [82]             | +                                           | ?                                       | +                                                                       | ?                                                             | +                                                      | +                                    | ?          |
| Ginieis et al., 2018 [83]           | +                                           | ?                                       | +                                                                       | ?                                                             | +                                                      | +                                    | ?          |
| Gonder-Frederick et al., 1987 [84]  | +                                           | ?                                       | ?                                                                       | ?                                                             | +                                                      | +                                    | ?          |
| Gui et al., 2021 [41]               | +                                           | +                                       | +                                                                       | +                                                             | +                                                      | +                                    |            |
| Hassevoort et al., 2020 [39]        | +                                           | +                                       | +                                                                       | +                                                             | +                                                      | +                                    |            |
| Hope et al., 2013 [85]              | ?                                           | ?                                       | +                                                                       | ?                                                             | +                                                      | +                                    | ?          |
| Jones et al., 2012 [32]             | +                                           | ?                                       | +                                                                       | ?                                                             | +                                                      | +                                    | +          |
| Kaplan et al., 2000 [31]            | ?                                           | ?                                       | +                                                                       | ?                                                             | +                                                      | +                                    | ?          |
| Kaplan et al., 2001 [33]            | ?                                           | ?                                       | +                                                                       | ?                                                             | +                                                      | +                                    | ?          |
| Kennedy and Scholey, 2000 [86]      | +                                           | ?                                       | +                                                                       | ?                                                             | +                                                      | +                                    | ?          |
| Lester et al., 1982 [38]            | +                                           | +                                       | +                                                                       | +                                                             | +                                                      | +                                    |            |
| Maben and Smith, 1996 [49]          | +                                           | ?                                       | +                                                                       | ?                                                             | ?                                                      | ?                                    | ?          |
| Macpherson et al., 2015 [87]        | +                                           | ?                                       | +                                                                       | ?                                                             | +                                                      | +                                    | ?          |
| Mantantzis et al., 2018 [88]        | +                                           | ?                                       | +                                                                       | ?                                                             | +                                                      | +                                    | ?          |
| Martin and Benton, 1999 [89]        | +                                           | ?                                       | +                                                                       | ?                                                             | +                                                      | +                                    | ?          |
| Meikle et al., 2004 [53]            | ?                                           | ?                                       | +                                                                       | ?                                                             | +                                                      | +                                    | ?          |
| Meikle et al., 2005 [54]            | +                                           | ?                                       | +                                                                       | ?                                                             | +                                                      | +                                    | ?          |
| Messier et al., 1998 [90]           | +                                           | ?                                       | ?                                                                       | ?                                                             | +                                                      | +                                    | ?          |
| Miller et al., 2013 [91]            | +                                           | ?                                       | +                                                                       | ?                                                             | +                                                      | +                                    | +          |
| Mohanty and Flint, 2001 [92]        | +                                           | ?                                       | +                                                                       | ?                                                             | +                                                      | ?                                    | ?          |
| Naveed et al., 2020 [43]            | +                                           | +                                       | +                                                                       | +                                                             | +                                                      | +                                    |            |
| Overby et al., 2013 [45]            | +                                           | +                                       | +                                                                       | +                                                             | +                                                      | +                                    |            |
| Owen et al., 2010 [55]              | +                                           | ?                                       | +                                                                       | ?                                                             | +                                                      | +                                    | ?          |
| Owen et al., 2012 [56]              | +                                           | ?                                       | +                                                                       | ?                                                             | +                                                      | +                                    | ?          |
| Owen et al., 2013 [57]              | +                                           | ?                                       | +                                                                       | ?                                                             | +                                                      | +                                    | ?          |
| Parker and Benton, 1995 [93]        | +                                           | ?                                       | +                                                                       | ?                                                             | +                                                      | ?                                    | ?          |
| Peters et al., 2020a [30]           | +                                           | ?                                       | +                                                                       | ?                                                             | +                                                      | +                                    | ?          |
| Riby et al., 2004 [94]              | ?                                           | ?                                       | +                                                                       | ?                                                             | +                                                      | +                                    | ?          |
| Riby et al., 2008 [95]              | ?                                           | ?                                       | +                                                                       | ?                                                             | +                                                      | +                                    | ?          |
| Riby et al., 2011 [96]              | +                                           | ?                                       | +                                                                       | ?                                                             | +                                                      | +                                    | ?          |
| Scholey et al., 2001 [97]           | +                                           | ?                                       | +                                                                       | ?                                                             | +                                                      | +                                    | ?          |
| Scholey et al., 2009 [98]           | +                                           | ?                                       | +                                                                       | ?                                                             | +                                                      | +                                    | ?          |
| Scholey et al., 2014 [58]           | +                                           | ?                                       | +                                                                       | ?                                                             | +                                                      | +                                    | +          |
| Serra-Grabulosa et al., 2021 [59]   | +                                           | ?                                       | +                                                                       | ?                                                             | +                                                      | +                                    | ?          |
| Smith and Foster, 2008 [99]         | ?                                           | ?                                       | +                                                                       | ?                                                             | +                                                      | +                                    | ?          |
| Smith et al., 2011b [100]           | ?                                           | ?                                       | +                                                                       | ?                                                             | +                                                      | +                                    | ?          |
| Spier et al., 1998 [101]            | +                                           | ?                                       | +                                                                       | ?                                                             | +                                                      | ?                                    | ?          |
| Tollery and Christian, 2013 [102]   | +                                           | ?                                       | +                                                                       | ?                                                             | +                                                      | +                                    | ?          |
| Tollery and Christian, 2015 [103]   | +                                           | ?                                       | +                                                                       | ?                                                             | +                                                      | +                                    | ?          |
| Tollery and Christian, 2016 [104]   | +                                           | ?                                       | +                                                                       | ?                                                             | +                                                      | +                                    | ?          |
| Sunram-Lea et al., 2001 [105]       | +                                           | ?                                       | +                                                                       | ?                                                             | +                                                      | +                                    | ?          |
| Sunram-Lea et al., 2002a [106]      | +                                           | ?                                       | +                                                                       | ?                                                             | +                                                      | +                                    | ?          |
| Sunram-Lea et al., 2002b [50]       | +                                           | ?                                       | +                                                                       | ?                                                             | +                                                      | +                                    | ?          |
| Sunram-Lea et al., 2008 [107]       | +                                           | ?                                       | +                                                                       | ?                                                             | +                                                      | +                                    | ?          |
| Sunram-Lea et al., 2011 [108]       | +                                           | ?                                       | +                                                                       | ?                                                             | +                                                      | +                                    | ?          |
| Van der Zwaluw et al., 2014 [61]    | +                                           | ?                                       | ?                                                                       | ?                                                             | +                                                      | +                                    | ?          |
| Walk et al., 2017 [60]              | +                                           | ?                                       | +                                                                       | ?                                                             | +                                                      | +                                    | +          |
| Winder and Borriell, 1998 [109]     | +                                           | ?                                       | +                                                                       | ?                                                             | +                                                      | +                                    | ?          |
| Ye et al., 2011 [48]                | +                                           | +                                       | +                                                                       | +                                                             | +                                                      | ?                                    |            |
| Zhang et al., 2022 [42]             | +                                           | +                                       | +                                                                       | +                                                             | +                                                      | +                                    | +          |

Supplementary Figure S2: Risk of bias summary
