# Supplementary material for: The Impact of Free and Added Sugars on Cognitive Function: A Systematic Review and Meta-Analysis
Source: MDPI journal article supplement (doi:10.3390/nu16010075), 2023-12-25
Supplement: s1 [file s1]

**Supplementary Table S1:** Results of searches conducted on 30<sup>th</sup> August 2023.

| PubMed   |                                                                                                                                                                                                                                                                                                                                                                                                                                                                                                                                                                                                                                                                                                                                                                                                                                                                                                                                                                                                                                                                                                                                                                                                                                                                                                                                                                                                                                                                                                |             |
|----------|------------------------------------------------------------------------------------------------------------------------------------------------------------------------------------------------------------------------------------------------------------------------------------------------------------------------------------------------------------------------------------------------------------------------------------------------------------------------------------------------------------------------------------------------------------------------------------------------------------------------------------------------------------------------------------------------------------------------------------------------------------------------------------------------------------------------------------------------------------------------------------------------------------------------------------------------------------------------------------------------------------------------------------------------------------------------------------------------------------------------------------------------------------------------------------------------------------------------------------------------------------------------------------------------------------------------------------------------------------------------------------------------------------------------------------------------------------------------------------------------|-------------|
| Search # | Search terms                                                                                                                                                                                                                                                                                                                                                                                                                                                                                                                                                                                                                                                                                                                                                                                                                                                                                                                                                                                                                                                                                                                                                                                                                                                                                                                                                                                                                                                                                   | Items found |
| #1       | "cognition"[MeSH Terms] OR "executive function"[MeSH Terms]                                                                                                                                                                                                                                                                                                                                                                                                                                                                                                                                                                                                                                                                                                                                                                                                                                                                                                                                                                                                                                                                                                                                                                                                                                                                                                                                                                                                                                    | 201,156     |
| #2       | "cognit*"[Title/Abstract] OR "executive function*"[Title/Abstract] OR "brain function*"[Title/Abstract] OR "memory"[Title/Abstract] OR "decision making"[Title/Abstract] OR "inhibitory control"[Title/Abstract] OR "mental planning"[Title/Abstract] OR "psychomotor speed"[Title/Abstract] OR "psycho-motor speed"[Title/Abstract]                                                                                                                                                                                                                                                                                                                                                                                                                                                                                                                                                                                                                                                                                                                                                                                                                                                                                                                                                                                                                                                                                                                                                           | 874,680     |
| #3       | #1 OR #2                                                                                                                                                                                                                                                                                                                                                                                                                                                                                                                                                                                                                                                                                                                                                                                                                                                                                                                                                                                                                                                                                                                                                                                                                                                                                                                                                                                                                                                                                       | 955,249     |
| #4       | "sugars"[MeSH Terms]                                                                                                                                                                                                                                                                                                                                                                                                                                                                                                                                                                                                                                                                                                                                                                                                                                                                                                                                                                                                                                                                                                                                                                                                                                                                                                                                                                                                                                                                           | 436,872     |
| #5       | "sugar*"[Title/Abstract] OR "carbohydrate*"[Title/Abstract] OR "sucrose"[Title/Abstract] OR "fructose"[Title/Abstract] OR "glucose"[Title/Abstract]                                                                                                                                                                                                                                                                                                                                                                                                                                                                                                                                                                                                                                                                                                                                                                                                                                                                                                                                                                                                                                                                                                                                                                                                                                                                                                                                            | 820,736     |
| #6       | #4 OR #5                                                                                                                                                                                                                                                                                                                                                                                                                                                                                                                                                                                                                                                                                                                                                                                                                                                                                                                                                                                                                                                                                                                                                                                                                                                                                                                                                                                                                                                                                       | 966,989     |
| #7       | #3 AND #6                                                                                                                                                                                                                                                                                                                                                                                                                                                                                                                                                                                                                                                                                                                                                                                                                                                                                                                                                                                                                                                                                                                                                                                                                                                                                                                                                                                                                                                                                      | 15,817      |
| #8       | "stroke"[MeSH Terms] OR "neoplasms"[MeSH Terms] OR "schizophrenia"[MeSH Terms]                                                                                                                                                                                                                                                                                                                                                                                                                                                                                                                                                                                                                                                                                                                                                                                                                                                                                                                                                                                                                                                                                                                                                                                                                                                                                                                                                                                                                 | 3,982,840   |
| #9       | "diabetic"[Title/Abstract] OR "cancer*"[Title/Abstract] OR "neoplasm*"[Title/Abstract] OR "adenoma"[Title/Abstract] OR "chemotherapy"[Title/Abstract] OR "schizophreni*"[Title/Abstract] OR "pesticide"[Title/Abstract] OR "bumblebee*"[Title/Abstract] OR "honeybee*"[Title/Abstract] OR "honey bee*"[Title/Abstract] OR "encephalopathy"[Title/Abstract] OR "earthworm"[Title/Abstract] OR "drosophila"[Title/Abstract] OR "covid"[Title/Abstract] OR "covid-19"[Title/Abstract] OR "HIV"[Title/Abstract] OR "opioid*"[Title/Abstract] OR "alcohol"[Title/Abstract] OR "cocaine"[Title/Abstract] OR "methylphenidate"[Title/Abstract] OR "NSAID"[Title/Abstract] OR "hypoxi*"[Title/Abstract] OR "atherosclerosis"[Title/Abstract] OR "apnea"[Title/Abstract] OR "ischemi*"[Title/Abstract] OR "ischaemi*"[Title/Abstract] OR "alopecia"[Title/Abstract] OR "fibromyalgia"[Title/Abstract] OR "liver disease"[Title/Abstract] OR "epilep*"[Title/Abstract] OR "herpes"[Title/Abstract] OR "anorexi*"[Title/Abstract] OR "bulimi*"[Title/Abstract] OR "parkinson*"[Title/Abstract] OR "huntington*"[Title/Abstract] OR "stroke"[Title/Abstract] OR "tourette*"[Title/Abstract] OR "myocardial infarction"[Title/Abstract] OR "soil"[Title/Abstract] OR "multiple sclerosis"[Title/Abstract] OR "bipolar"[Title/Abstract] OR "autism"[Title/Abstract] OR "autistic"[Title/Abstract] OR "ADHD"[Title/Abstract] OR "brain injury"[Title/Abstract] OR "mild cognitive impairment"[Title/Abstract] | 5,903,114   |
| #10      | #8 OR #9                                                                                                                                                                                                                                                                                                                                                                                                                                                                                                                                                                                                                                                                                                                                                                                                                                                                                                                                                                                                                                                                                                                                                                                                                                                                                                                                                                                                                                                                                       | 7,729,023   |
| #11      | #7 NOT #10                                                                                                                                                                                                                                                                                                                                                                                                                                                                                                                                                                                                                                                                                                                                                                                                                                                                                                                                                                                                                                                                                                                                                                                                                                                                                                                                                                                                                                                                                     | 9,825       |
| Embase   |                                                                                                                                                                                                                                                                                                                                                                                                                                                                                                                                                                                                                                                                                                                                                                                                                                                                                                                                                                                                                                                                                                                                                                                                                                                                                                                                                                                                                                                                                                |             |
| Search # | Search terms                                                                                                                                                                                                                                                                                                                                                                                                                                                                                                                                                                                                                                                                                                                                                                                                                                                                                                                                                                                                                                                                                                                                                                                                                                                                                                                                                                                                                                                                                   | Items found |
| #1       | cognition'/exp                                                                                                                                                                                                                                                                                                                                                                                                                                                                                                                                                                                                                                                                                                                                                                                                                                                                                                                                                                                                                                                                                                                                                                                                                                                                                                                                                                                                                                                                                 | 2,817,625   |
| #2       | executive function'/exp                                                                                                                                                                                                                                                                                                                                                                                                                                                                                                                                                                                                                                                                                                                                                                                                                                                                                                                                                                                                                                                                                                                                                                                                                                                                                                                                                                                                                                                                        | 50,107      |

|               |                                                                                                                                                                                                                                        |           |
|---------------|----------------------------------------------------------------------------------------------------------------------------------------------------------------------------------------------------------------------------------------|-----------|
| #3            | cognit*:ab,ti OR 'executive function*':ab,ti OR 'brain function*':ab,ti OR memory:ab,ti OR 'mental planning':ab,ti OR 'decision making':ab,ti OR 'inhibitory control':ab,ti OR 'psychomotor speed':ab,ti OR 'psycho-motor speed':ab,ti | 1,139,922 |
| #4            | #1 OR #2 OR #3                                                                                                                                                                                                                         | 3,258,609 |
| #5            | sugar'/exp                                                                                                                                                                                                                             | 31,015    |
| #6            | sugar*:ab,ti OR carbohydrate*:ab,ti OR glucose:ab,ti OR fructose:ab,ti OR sucrose:ab,ti                                                                                                                                                | 1,033,373 |
| #7            | #5 OR #6                                                                                                                                                                                                                               | 1,037,693 |
| #8            | #4 AND #7                                                                                                                                                                                                                              | 46,922    |
| #9            | 'schizophrenia'/exp                                                                                                                                                                                                                    | 208,527   |
| #10           | diabetes mellitus'/exp                                                                                                                                                                                                                 | 1,163,949 |
| #11           | cerebrovascular accident'/exp                                                                                                                                                                                                          | 390,372   |
| #12           | diabetic:ab,ti OR cancer*:ab,ti OR neoplasm*:ab,ti OR adenoma:ab,ti OR chemotherapy:ab,ti OR pesticide:ab,ti OR bumblebee*:ab,ti OR honeybee*:ab,ti OR 'honey bee*':ab,ti                                                              | 3,855,750 |
| #13           | encephalopathy:ab,ti OR earthworm:ab,ti OR drosophila:ab,ti OR covid:ab,ti OR 'covid 19':ab,ti OR hiv:ab,ti OR opioid:ab,ti OR alcohol*:ab,ti OR cocaine:ab,ti OR methylphenidate:ab,ti OR nsaid:ab,ti                                 | 1,554,609 |
| #14           | hypoxi*:ab,ti OR atherosclerosis:ab,ti OR apnea:ab,ti OR ischemi*:ab,ti OR ischaemi*:ab,ti OR alopecia:ab,ti OR fibromyalgia:ab,ti OR 'liver disease':ab,ti OR epilep*:ab,ti OR herpes:ab,ti OR anorexi*:ab,ti OR bulimi*:ab,ti        | 1,572,039 |
| #15           | parkinson*:ab,ti OR huntington*:ab,ti OR stroke:ab,ti OR tourette*:ab,ti OR 'myocardial infarction':ab,ti OR soil:ab,ti OR 'multiple sclerosis':ab,ti OR bipolar:ab,ti OR autism:ab,ti OR autistic:ab,ti OR adhd:ab,ti                 | 1,440,534 |
| #16           | schizophreni*:ab,ti OR 'mild cognitive impairment':ab,ti OR 'brain injury':ab,ti                                                                                                                                                       | 317,469   |
| #17           | #9 OR #10 OR #11 OR #12 OR #13 OR #14 OR #15 OR #16                                                                                                                                                                                    | 8,713,247 |
| #18           | #8 NOT #17                                                                                                                                                                                                                             |           |
| <b>Cinahl</b> |                                                                                                                                                                                                                                        |           |
| S1            | (MH "Cognition+")                                                                                                                                                                                                                      | 75,951    |
| S2            | (MH "Executive Function")                                                                                                                                                                                                              | 6,049     |
| S3            | TI cognit* OR TI "executive function*" OR TI "brain function*" OR TI memory OR TI "decision making" OR TI "inhibitory control" OR TI "mental planning" OR TI "psychomotor speed" OR TI "psycho-motor speed"                            | 102,970   |
| S4            | AB cognit* OR AB "executive function*" OR AB "brain function*" OR AB memory OR AB "decision making" OR AB "inhibitory control" OR AB "mental planning" OR AB "psychomotor speed" OR AB "psycho-motor speed"                            | 243,816   |
| S5            | S1 OR S2 OR S3 OR S4                                                                                                                                                                                                                   | 309,676   |
| S6            | TI sugar* OR TI fructose OR TI sucrose OR TI glucose OR TI carbohydrate*                                                                                                                                                               | 33,045    |
| S7            | AB sugar* OR AB fructose OR AB sucrose OR AB glucose OR AB carbohydrate*                                                                                                                                                               | 93,842    |
| S8            | S6 OR S7                                                                                                                                                                                                                               | 106,811   |
| S9            | S5 AND S8                                                                                                                                                                                                                              | 3,272     |
| S10           | (MH "Stroke+")                                                                                                                                                                                                                         | 77,673    |

|                      |                                                                                                                                                                                                             |           |
|----------------------|-------------------------------------------------------------------------------------------------------------------------------------------------------------------------------------------------------------|-----------|
| S11                  | (MH "Neoplasms+")                                                                                                                                                                                           | 631,127   |
| S12                  | (MH "Schizophrenia+")                                                                                                                                                                                       | 27,889    |
| S13                  | TI diabetic OR TI cancer* OR TI neoplasm* OR TI adenoma OR TI chemotherapy OR TI pesticide OR TI bumblebee* OR TI honeybee* OR TI "honey bee*"                                                              | 381,224   |
| S14                  | AB diabetic OR AB cancer* OR AB neoplasm* OR AB adenoma OR AB chemotherapy OR AB pesticide OR AB bumblebee* OR AB honeybee* OR AB "honey bee*"                                                              | 415,434   |
| S15                  | TI encephalopathy OR TI earthworm OR TI drosophila OR TI covid OR TI covid-19 OR TI hiv OR TI opioid OR TI alcohol* OR TI cocaine OR TI methylphenidate OR TI NSAID                                         | 219,623   |
| S16                  | AB encephalopathy OR AB earthworm OR AB drosophila OR AB covid OR AB covid-19 OR AB hiv OR AB opioid OR AB alcohol* OR AB cocaine OR AB methylphenidate OR AB NSAID                                         | 255,617   |
| S17                  | TI hypoxi* OR TI atherosclerosis OR TI apnea OR TI ischemi* OR TI ischaemi* OR TI alopecia OR TI fibromyalgia OR TI "liver disease" OR TI epilep* OR TI herpes OR TI anorexi* OR TI bulimi*                 | 93,394    |
| S18                  | AB hypoxi* OR AB atherosclerosis OR AB apnea OR AB ischemi* OR AB ischaemi* OR AB alopecia OR AB fibromyalgia OR AB "liver disease" OR AB epilep* OR AB herpes OR AB anorexi* OR AB bulimi*                 | 152,875   |
| S19                  | TI parkinson* OR TI huntington* OR TI stroke OR TI tourette* OR TI "myocardial infarction" OR TI soil OR TI "multiple sclerosis" OR TI bipolar OR TI autism OR TI autistic OR TI ADHD                       | 167,823   |
| S20                  | AB parkinson* OR AB huntington* OR AB stroke OR AB tourette* OR AB "myocardial infarction" OR AB soil OR AB "multiple sclerosis" OR AB bipolar OR AB autism OR AB autistic OR AB ADHD                       | 199,303   |
| S21                  | TI schizophre* OR TI "mild cognitive impairment" OR TI "brain injury"                                                                                                                                       | 41,453    |
| S22                  | AB schizophre* OR AB "mild cognitive impairment" OR AB "brain injury"                                                                                                                                       | 52,683    |
| S23                  | S10 OR S11 OR S12 OR S13 OR S14 OR S15 OR S16 OR S17 OR S18 OR S19 OR S20 OR S21 OR S22                                                                                                                     | 1,607,686 |
| S24                  | S9 NOT S23                                                                                                                                                                                                  | 2,209     |
| <b>PsychArticles</b> |                                                                                                                                                                                                             |           |
| S1                   | DE cognition                                                                                                                                                                                                | 6,157     |
| S2                   | DE executive function                                                                                                                                                                                       | 1,142     |
| S3                   | TI cognit* OR TI "executive function*" OR TI "brain function*" OR TI memory OR TI "decision making" OR TI "inhibitory control" OR TI "mental planning" OR TI "pscyhomotor speed" OR TI "psycho-motor speed" | 14,834    |
| S4                   | AB cognit* OR AB "executive function*" OR AB "brain function*" OR AB memory OR AB "decision making" OR AB "inhibitory control" OR AB "mental planning" OR AB "pscyhomotor speed" OR AB "psycho-motor speed" | 35,963    |
| S5                   | S1 OR S2 OR S3 OR S4                                                                                                                                                                                        | 39,571    |
| S6                   | DE sugars                                                                                                                                                                                                   | 127       |
| S7                   | TI sugar* OR TI fructose OR TI sucrose OR TI glucose OR TI carbohydrate*                                                                                                                                    | 192       |
| S8                   | AB sugar* OR AB fructose OR AB sucrose OR AB glucose OR AB carbohydrate*                                                                                                                                    | 846       |

|                  |                                                                                                                                                                                                             |         |
|------------------|-------------------------------------------------------------------------------------------------------------------------------------------------------------------------------------------------------------|---------|
| S9               | S6 OR S7 OR S8                                                                                                                                                                                              | 854     |
| S10              | S5 AND S9                                                                                                                                                                                                   | 113     |
| S11              | DE schizophrenia                                                                                                                                                                                            | 4,594   |
| S12              | DE stroke                                                                                                                                                                                                   | 73      |
| S13              | DE neoplasms                                                                                                                                                                                                | 742     |
| S14              | TI diabetic OR TI cancer* OR TI neoplasm* OR TI adenoma OR TI chemotherapy OR TI pesticide OR TI bumblebee* OR TI honeybee* OR TI "honey bee*"                                                              | 830     |
| S15              | AB diabetic OR AB cancer* OR AB neoplasm* OR AB adenoma OR AB chemotherapy OR AB pesticide OR AB bumblebee* OR AB honeybee* OR AB "honey bee*"                                                              | 1,450   |
| S16              | TI encephalopathy OR TI earthworm OR TI drosophila OR TI covid OR TI covid-19 OR TI hiv OR TI opioid OR TI alcohol* OR TI cocaine OR TI methylphenidate OR TI NSAID                                         | 4,755   |
| S17              | AB encephalopathy OR AB earthworm OR AB drosophila OR AB covid OR AB covid-19 OR AB hiv OR AB opioid OR AB alcohol* OR AB cocaine OR AB methylphenidate OR AB NSAID                                         | 7,975   |
| S18              | TI hypoxi* OR TI atherosclerosis OR TI apnea OR TI ischemi* OR TI ischaemi* OR TI alopecia OR TI fibromyalgia OR TI "liver disease" OR TI epilep* OR TI herpes OR TI anorexi* OR TI bulimi*                 | 508     |
| S19              | AB hypoxi* OR AB atherosclerosis OR AB apnea OR AB ischemi* OR AB ischaemi* OR AB alopecia OR AB fibromyalgia OR AB "liver disease" OR AB epilep* OR AB herpes OR AB anorexi* OR AB bulimi*                 | 1,072   |
| S20              | TI parkinson* OR TI huntington* OR TI stroke OR TI tourette* OR TI "myocardial infarction" OR TI soil OR TI "multiple sclerosis" OR TI bipolar OR TI autism OR TI autistic OR TI ADHD                       | 1,664   |
| S21              | AB parkinson* OR AB huntington* OR AB stroke OR AB tourette* OR AB "myocardial infarction" OR AB soil OR AB "multiple sclerosis" OR AB bipolar OR AB autism OR AB autistic OR AB ADHD                       | 3,274   |
| S22              | TI schizophre* OR TI "mild cognitive impairment" OR TI "brain injury"                                                                                                                                       | 3,713   |
| S23              | AB schizophre* OR AB "mild cognitive impairment" OR AB "brain injury"                                                                                                                                       | 5,672   |
| S24              | S11 OR S12 OR S13 OR S14 OR S15 OR S16 OR S17 OR S18 OR S19 OR S20 OR S21 OR S22 OR S23                                                                                                                     | 19,514  |
| S25              | S10 NOT S24                                                                                                                                                                                                 | 100     |
| <b>PsychINFO</b> |                                                                                                                                                                                                             |         |
| S1               | DE "Cognition"                                                                                                                                                                                              | 82,268  |
| S2               | DE "Executive Function"                                                                                                                                                                                     | 18,684  |
| S3               | TI cognit* OR TI "executive function*" OR TI "brain function*" OR TI memory OR TI "decision making" OR TI "inhibitory control" OR TI "mental planning" OR TI "psychomotor speed" OR TI "psycho-motor speed" | 265,392 |
| S4               | AB cognit* OR AB "executive function*" OR AB "brain function*" OR AB memory OR AB "decision making" OR AB "inhibitory control" OR AB "mental planning" OR AB "psychomotor speed" OR AB "psycho-motor speed" | 725,035 |
| S5               | S1 OR S2 OR S3 OR S4                                                                                                                                                                                        | 775,081 |
| S6               | DE "Sugars"                                                                                                                                                                                                 | 2,469   |

|     |                                                                                                                                                                                             |         |
|-----|---------------------------------------------------------------------------------------------------------------------------------------------------------------------------------------------|---------|
| S7  | TI sugar* OR TI fructose OR TI sucrose OR TI glucose OR TI carbohydrate*                                                                                                                    | 6,543   |
| S8  | AB sugar* OR AB fructose OR AB sucrose OR AB glucose OR AB carbohydrate*                                                                                                                    | 31,762  |
| S9  | S6 OR S7 OR S8                                                                                                                                                                              | 32,442  |
| S10 | S5 AND S9                                                                                                                                                                                   | 4,638   |
| S11 | DE "Schizophrenia"                                                                                                                                                                          | 103,249 |
| S12 | DE "Cerebrovascular Accidents"                                                                                                                                                              | 23,290  |
| S13 | DE "Neoplasms"                                                                                                                                                                              | 44,009  |
| S14 | TI diabetic OR TI cancer* OR TI neoplasm* OR TI adenoma OR TI chemotherapy OR TI pesticide OR TI bumblebee* OR TI honeybee* OR TI "honey bee*"                                              | 45,726  |
| S15 | AB diabetic OR AB cancer* OR AB neoplasm* OR AB adenoma OR AB chemotherapy OR AB pesticide OR AB bumblebee* OR AB honeybee* OR AB "honey bee*"                                              | 79,374  |
| S16 | TI encephalopathy OR TI earthworm OR TI drosophila OR TI covid OR TI covid-19 OR TI hiv OR TI opioid OR TI alcohol* OR TI cocaine OR TI methylphenidate OR TI NSAID                         | 146,227 |
| S17 | AB encephalopathy OR AB earthworm OR AB drosophila OR AB covid OR AB covid-19 OR AB hiv OR AB opioid OR AB alcohol* OR AB cocaine OR AB methylphenidate OR AB NSAID                         | 255,388 |
| S18 | TI hypoxi* OR TI atherosclerosis OR TI apnea OR TI ischemi* OR TI ischaemi* OR TI alopecia OR TI fibromyalgia OR TI "liver disease" OR TI epilep* OR TI herpes OR TI anorexi* OR TI bulimi* | 52,048  |
| S19 | AB hypoxi* OR AB atherosclerosis OR AB apnea OR AB ischemi* OR AB ischaemi* OR AB alopecia OR AB fibromyalgia OR AB "liver disease" OR AB epilep* OR AB herpes OR AB anorexi* OR AB bulimi* | 99,718  |
| S20 | TI parkinson* OR TI huntington* OR TI stroke OR TI tourette* OR TI "myocardial infarction" OR TI soil OR TI "multiple sclerosis" OR TI bipolar OR TI autism OR TI autistic OR TI ADHD       | 129,206 |
| S21 | AB parkinson* OR AB huntington* OR AB stroke OR AB tourette* OR AB "myocardial infarction" OR AB soil OR AB "multiple sclerosis" OR AB bipolar OR AB autism OR AB autistic OR AB ADHD       | 222,687 |
| S22 | TI schizophreni* OR TI "mild cognitive impairment" OR TI "brain injury"                                                                                                                     | 93,703  |
| S23 | AB schizophreni* OR AB "mild cognitive impairment" OR AB "brain injury"                                                                                                                     | 159,706 |
| S24 | S11 OR S12 OR S13 OR S14 OR S15 OR S16 OR S17 OR S18 OR S19 OR S20 OR S21 OR S22 OR S23                                                                                                     | 785,070 |
| S25 | S10 NOT S24                                                                                                                                                                                 | 3,059   |
