# Supplementary figures and images for: The Impact of Free and Added Sugars on Cognitive Function: A Systematic Review and Meta-Analysis
Source: MDPI journal article supplement (doi:10.3390/nu16010075), 2023-12-25

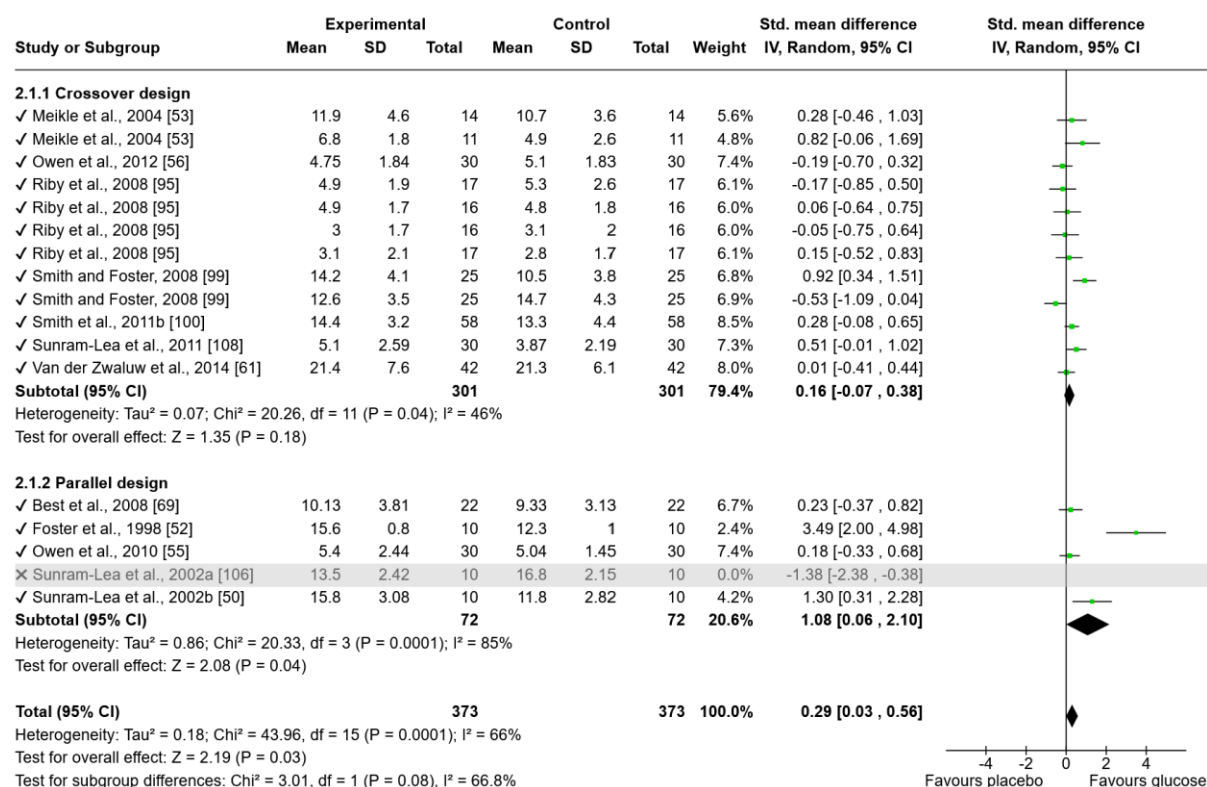

**Supplementary Figure S3: Influence analysis of sugar consumption and delayed free recall.**

Supplement: s1 [file s1]
